# Supplementary material
Source: publisher site journal article supplement (https://www.dovepress.com/article/352490)
Supplement: Supplementary file 1 [file get_supplementary_file.php]

**Supplemental Table 1:** Ranges for the metabolic risk factors and measures of CRF before and following training.

| **Characteristic** | **Men (n = 183)** | | **Women (n = 153)** | | **Total (n = 336)** | |
| --- | --- | --- | --- | --- | --- | --- |
| **Baseline** | **Post-Training** | **Baseline** | **Post-Training** | **Baseline** | **Post-Training** |
| Age (years) | 23.0 - 77.0 | 24.0 - 78.0 | 21.0 - 75.0 | 21.0 - 75.0 | 21.0 - 77.0 | 21.0 - 78.0 |
| Body Weight (kg) | 54.1 - 147.7 | 45.9 - 144.5 | 47.5 - 119.9 | 48.4 - 117.5 | 47.5 - 147.7 | 45.9 - 144.5 |
| BMI (kg/m2) | 17.3 - 46.0 | 14.9 - 45.6 | 17.4 - 44.2 | 17.5 - 41.9 | 17.3 - 46.0 | 14.9 - 45.6 |
| Fasting Blood Glucose (mg/dL) | 71.0 - 145.0 | 69.0 - 154.0 | 66.0 - 156.0 | 61.0 - 191.0 | 66.0 - 156.0 | 61.0 - 191.0 |
| Waist Circumference (cm) | 70.0 - 133.0 | 70.4 - 121.5 | 62.5 - 126.4 | 61.4 - 128.0 | 62.5 - 133.0 | 61.4 - 128.0 |
| Resting sBP (mmHg) | 95.0 - 180.0 | 90.0 - 164.0 | 84.0 - 178.0 | 80.0 - 150.0 | 84.0 - 180.0 | 80.0 - 164.0 |
| Resting dBP (mmHg) | 60.0 - 110.0 | 50.0 - 110.0 | 52.0 - 110.0 | 50.0 - 102.0 | 52.0 - 110.0 | 50.0 - 110.0 |
| HDL-C (mg/dL) | 22.0 - 80.0 | 13.8 - 90.0 | 29.0 - 105.0 | 30.0 - 108.0 | 22.0 - 105.0 | 13.8 - 108.0 |
| Triglycerides (mg/dL) | 34.0 - 398.0 | 33.5 - 540.0 | 7.0 - 310.8 | 28.2 - 247.0 | 7.0 - 398.0 | 28.2 - 540.0 |
| MS Risk Factors (#) | 0.0 - 5.0 | 0.0 - 5.0 | 0.0 - 5.0 | 0.0 - 5.0 | 0.0 - 5.0 | 0.0 - 5.0 |
| CRF (ml/kg/min) | 16.7 - 58.0 | 18.1 - 60.0 | 11.7 - 44.2 | 15.5 - 49.0 | 11.7 - 58.0 | 15.5 - 60.0 |
| FRIEND (%) | 3.0 - 92.0 | 10.0 - 98.0 | 3.0 - 98.0 | 10.0 - 98.0 | 3.0 - 98.0 | 10.0 - 98.0 |

**Supplemental Table 2:** Effect sizes (95% CI) for the metabolic risk factors and measures of CRF.

| **Characteristic** | **Men (n = 183)** | **Women (n = 153)** | **Total (n = 336)** |
| --- | --- | --- | --- |
| Body Weight (kg) | -0.15 (-0.30 - 0.00) | -0.20 (-0.41 - 0.00) | -0.13 (-0.35 - 0.10) |
| BMI (kg/m2) | -0.17 (-0.32 - -0.02) * | -0.21 (-0.41 - -0.00) * | -0.15 (-0.37 - 0.08) |
| Fasting Blood Glucose (mg/dL) | 0.11 (-0.04 - 0.26) | 0.12 (-0.08 - 0.33) | 0.11 (-0.12 - 0.33) |
| Waist Circumference (cm) | -0.20 (-0.35 - -0.05) * | -0.33 (-0.54 - -0.12) * | -0.15 (-0.38 - 0.07) |
| Resting sBP (mmHg) | -0.35 (-0.50 - -0.19) * | -0.40 (-0.61 - -0.19) * | -0.30 (-0.53 - -0.08) * |
| Resting dBP (mmHg) | -0.31 (-0.46 - -0.16) * | -0.39 (-0.60 - -0.18) * | -0.24 (-0.47 - -0.02) * |
| HDL-C (mg/dL) | 0.14 (-0.01 - 0.29) | 0.31 (0.10 - 0.52) * | 0.01 (-0.22 - 0.23) |
| Triglycerides (mg/dL) | -0.15 (-0.31 - -0.00) * | -0.20 (-0.40 - 0.01) | -0.10 (-0.33 - 0.12) |
| MS Risk Factors (#) | -0.20 (-0.35 - -0.05) * | -0.24 (-0.45 - -0.04) * | -0.16 (-0.38 - 0.07) |
| CRF (ml/kg/min) | 0.54 (0.39 - 0.70) * | 0.63 (0.42 - 0.85) * | 0.65 (0.42 - 0.89) * |
| FRIEND (%) | 0.78 (0.62 - 0.95) * | 0.80 (0.58 - 1.02) * | 0.79 (0.55 - 1.03) * |

*Denotes a statistically significant effect size (P<0.05)
